# Supplementary material for: Positive selection and comparative molecular evolution of reproductive proteins from New Zealand tree weta (Orthoptera, Hemideina)
Source: PLoS One. 2017 Nov 13;12(11):e0188147. doi: 10.1371/journal.pone.0188147 (PMC5683631; doi:10.1371/journal.pone.0188147)
Supplement: S2 Table — Annotations from tblastx against non-redundant database. (XLSX) [file pone.0188147.s002.xlsx]

## Sheet: Primers
Annotation	Primer	Sequence (5' - 3')	Notes
Cytochome oxidase subunit I (COI)	COI-F	TCGACCCCGCAGGAGGAGGA	Amplifies only H. crassidens
	COI-R	TAGCTGTGTTCTGCGGGGG
	COI-F2	TGTTCAGCTGGGGGTGTGTGT	Amplifies H. trewicki and H. thoracica
	COI-R2	CAGTTTTAGCCGGGGCTATCACCAT
Serine protease snake-like (Protease)	prot1-F	TGTAAGGGTCCGTTGCGCAGT
	prot1-R	GCAGCGCTGTCCAGGAAGAGT
Testis specific ser/thr kinase (Tkinase)	Tkinase1-F	CGGAAGTAGTAAGTGGGACGCCG
	Tkinase1-R	CGCTGGTTGACATTGGAGTGGGA
Sperm flagellar protein (sflag)	Sflag1-F	TCGCCAGTTCAGACCTAGGATGAGG
	Sflag1-R	TGGCTCTGTACAAGGCTGGGA
Elongation factor 1 delta (EFdelta)	EFdelta-F	TGAAGATGTCGATGATGGTGTGG
	EFdelta-R	TGACATGTATTGCTAAACAGATGGGT
Accessory gland protein (Acp5)	Acc5-F	TCTCTGGCCATTTCTCGGGGAT
	Acc5-R	ACGTGCTGCGAAGCTGCGAT
Accessory gland protein (Acp4)	Acc4-F	TTGAGCCAAAGGGTCCAGATAGTGGT
	Acc4-R	ACAGGTCTTTTACATACAGCCTGCC
Accessory gland protein (Acp3)	Acc3-F	AAAGAAACCGTATGATTTGTGGCACG
	Acc3-R	GGCCTGTGAGAAGGAAGGCACTC
Unannotated contigs refmapcontig00670 & contig1351(Unk2)	NA2-F	TCAGTTCCTTTCTCATCTTTCAAACCC
	NA2-R	GCCCCAGTACAGTTCGCGAGT
